# Supplementary material
Source: PubMed Central journal article supplement (PMC5622865)
Supplement: 2017.166819.AGBANI_SUPPL.pdf [file 2017.166819.AGBANI_SUPPL.pdf]

---

**Temporal contribution of the platelet body and balloon to thrombin generation**

---

*Ejaife O. Aghani, Ingeborg Hers and Alastair W. Poole*

*School of Physiology, Pharmacology and Neuroscience, University of Bristol, Biomedical Sciences Building, UK*

*Correspondence: e.aghani@bristol.ac.uk*

*doi:10.3324/haematol.2017.166819*

*Movie S1*
