# Supplementary material
Source: PubMed Central journal article supplement (PMC5622865)
Supplement: 2017_166819-Disclosures_and_Contributions.pdf [file 2017_166819-Disclosures_and_Contributions.pdf]

Haematologica  
HAEMATOL/2017/166819  
Version 4

Temporal contribution of the platelet body and balloon to thrombin  
generation

Ejaife O Agbani, Ingeborg Hers, and Alastair W Poole

Disclosures: No conflicts of interest

Contributions: EOA designed and performed experiments, analyzed data and wrote the manuscript. IH and AWP interpreted data and revised manuscript.
